# Supplementary material
Source: PubMed Central journal article supplement (PMC3525009)
Supplement: supp_M112.412544_jbc.M112.412544-5.pdf [file supp_M112.412544_jbc.M112.412544-5.pdf]

Robert F. Lera and Mark E. Burkard. High mitotic activity of Polo-like Kinase 1 is required for chromosome segregation and genomic integrity in human epithelial cells

### **Supplementary Movie Legends**

**Movie S1.** H2B-mCherry expressing Plk1<sup>as</sup> cell undergoing a normal division. Related to Figure 2A, top row. 3-MB-PP1 concentration: 0  $\mu$ M.

**Movie S2.** H2B-mCherry expressing Plk1<sup>as</sup> cell dividing with a lagging chromosome. Related to Figure 2A, second row. 3-MB-PP1 concentration: 0.25  $\mu$ M.

**Movie S3.** H2B-mCherry expressing Plk1<sup>as</sup> cell exhibiting severely impaired chromosome segregation during anaphase. Related to Figure 2A, third row. 3-MB-PP1 concentration: 0.25  $\mu$ M.

**Movie S4.** H2B-mCherry expressing Plk1<sup>as</sup> cell exhibiting initial chromosome congression with subsequent loss of chromosome alignment. Related to Figure 2A, fourth row. 3-MB-PP1 concentration: 1  $\mu$ M.
